# Supplementary material for: Bacterial diversity and predicted enzymatic function in a multipurpose surface water system – from wastewater effluent discharges to drinking water production
Source: PubMed Central journal article supplement (PMC8140503; doi:10.1186/s40793-021-00379-w), 2021-05-22
Supplement: 40793_2021_379_MOESM2_ESM.pdf [file 40793_2021_379_MOESM2_ESM.pdf]

## **Supplemental Data Sheets S1-S10. Core bacterial communities in the groups of water samples**

Bacterial diversity and predicted enzymatic function in a multipurpose surface water system – from wastewater effluent discharges to drinking water production

by Ananda Tiwari, Anna-Maria Hokajärvi, Jorge Santo Domingo, Michael Elk, Balamuralikrishna Jayaprakash, Hodon Ryu, Sallamaari Siponen, Asko Vepsäläinen, Ari Kauppinen, Osmo Puurunen, Aki Artimo, Noora Perkola, Timo Huttula, Ilkka T. Miettinen and Tarja Pitkänen

Selection criteria for Supplemental Data Sheets:

1. Detection frequency of an OTU  $\geq 20\%$  in the sample group (sample prevalence; the OTU was found in 20% of samples in the specified sample group)
2. Relative abundance of an OTU  $\geq 0.01\%$  of total reads within each sample.

The OTUs having top 2-3 highest sample prevalence in each group are highlighted with red color.

**Supplemental Data Sheet S1.** Core bacterial communities in the municipal influent (n=7).

| OTU     | Detection Frequency % | Phylum         | Class                 | Order             | Family             | Genus         |
|---------|-----------------------|----------------|-----------------------|-------------------|--------------------|---------------|
| 1109857 | 86                    | Proteobacteria | Betaproteobacteria    | Burkholderiales   | Comamonadaceae     | Comamonas     |
| 942142  | 29                    | Proteobacteria | Betaproteobacteria    | Burkholderiales   | Comamonadaceae     | Polaromonas   |
| 776733  | 100                   | Proteobacteria | Epsilonproteobacteria | Campylobacterales | Campylobacteraceae | Arcobacter    |
| 1109080 | 100                   | Proteobacteria | Epsilonproteobacteria | Campylobacterales | Campylobacteraceae | Arcobacter    |
| 825090  | 100                   | Proteobacteria | Epsilonproteobacteria | Campylobacterales | Campylobacteraceae | Arcobacter    |
| 807542  | 71                    | Proteobacteria | Epsilonproteobacteria | Campylobacterales | Campylobacteraceae | Arcobacter    |
| 4400334 | 43                    | Proteobacteria | Epsilonproteobacteria | Fusobacteriales   | Leptotrichiaceae   | Leptotrichia  |
| 11164   | 29                    | Proteobacteria | Epsilonproteobacteria | Campylobacterales | Campylobacteraceae | Arcobacter    |
| 697170  | 29                    | Proteobacteria | Epsilonproteobacteria | Lactobacillales   | Carnobacteriaceae  | Trichococcus  |
| 546186  | 29                    | Proteobacteria | Epsilonproteobacteria | Campylobacterales | Campylobacteraceae | Arcobacter    |
| 839376  | 100                   | Proteobacteria | Gammaproteobacteria   | Aeromonadales     | Aeromonadaceae     |               |
| 1074011 | 86                    | Proteobacteria | Gammaproteobacteria   | Pseudomonadales   | Moraxellaceae      | Acinetobacter |
| 542450  | 86                    | Proteobacteria | Gammaproteobacteria   | Pseudomonadales   | Moraxellaceae      | Acinetobacter |
| 1061335 | 43                    | Proteobacteria | Gammaproteobacteria   | Pseudomonadales   | Moraxellaceae      | Acinetobacter |
| 1110300 | 43                    | Proteobacteria | Gammaproteobacteria   | Aeromonadales     | Aeromonadaceae     |               |
| 1121651 | 29                    | Proteobacteria | Gammaproteobacteria   | Aeromonadales     | Aeromonadaceae     |               |
| 607810  | 29                    | Proteobacteria | Gammaproteobacteria   | Fusobacteriales   |                    |               |

| Supplemental Data Sheet S2. Core bacterial communities in the municipal effluent (n=52). |                       |                |                       |                   |                    |                   |
|------------------------------------------------------------------------------------------|-----------------------|----------------|-----------------------|-------------------|--------------------|-------------------|
| OTU                                                                                      | Detection Frequency % | Phylum         | Class                 | Order             | Family             | Genus             |
| 781203                                                                                   | 25                    | Bacteroidetes  | Saprosirae            | [Saprosirales]    | Chitinophagaceae   | Sediminibacterium |
| 4322041                                                                                  | 21                    | Bacteroidetes  | Saprosirae            | [Saprosirales]    | Chitinophagaceae   | Sediminibacterium |
| 1106940                                                                                  | 73                    | Proteobacteria | Betaproteobacteria    | Burkholderiales   | Comamonadaceae     |                   |
| 609943                                                                                   | 65                    | Proteobacteria | Betaproteobacteria    | Procabacteriales  | Procabacteriaceae  |                   |
| 796924                                                                                   | 60                    | Proteobacteria | Betaproteobacteria    | Burkholderiales   | Comamonadaceae     | Rhodoferax        |
| 94716                                                                                    | 38                    | Proteobacteria | Betaproteobacteria    | Procabacteriales  | Procabacteriaceae  |                   |
| 155812                                                                                   | 37                    | Proteobacteria | Betaproteobacteria    | Procabacteriales  | Procabacteriaceae  |                   |
| 829669                                                                                   | 33                    | Proteobacteria | Betaproteobacteria    | Burkholderiales   | Comamonadaceae     | Hydrogenophaga    |
| 1109857                                                                                  | 31                    | Proteobacteria | Betaproteobacteria    | Burkholderiales   | Comamonadaceae     | Comamonas         |
| 942142                                                                                   | 31                    | Proteobacteria | Betaproteobacteria    | Burkholderiales   | Comamonadaceae     | Polaromonas       |
| 818376                                                                                   | 29                    | Proteobacteria | Betaproteobacteria    | Burkholderiales   | Comamonadaceae     | Rhodoferax        |
| 1123672                                                                                  | 27                    | Proteobacteria | Betaproteobacteria    | Burkholderiales   | Oxalobacteraceae   |                   |
| 835100                                                                                   | 23                    | Proteobacteria | Betaproteobacteria    | Burkholderiales   | Comamonadaceae     | Polaromonas       |
| 776733                                                                                   | 83                    | Proteobacteria | Epsilonproteobacteria | Campylobacterales | Campylobacteraceae | Arcobacter        |
| 1109080                                                                                  | 54                    | Proteobacteria | Epsilonproteobacteria | Campylobacterales | Campylobacteraceae | Arcobacter        |
| 807542                                                                                   | 48                    | Proteobacteria | Epsilonproteobacteria | Campylobacterales | Campylobacteraceae | Arcobacter        |
| 825090                                                                                   | 40                    | Proteobacteria | Epsilonproteobacteria | Campylobacterales | Campylobacteraceae | Arcobacter        |
| 334424                                                                                   | 73                    | Proteobacteria | Gammaproteobacteria   | Pseudomonadales   | Moraxellaceae      |                   |
| 586540                                                                                   | 38                    | Proteobacteria | Gammaproteobacteria   | Pseudomonadales   | Moraxellaceae      |                   |
| 348203                                                                                   | 25                    | Proteobacteria | Gammaproteobacteria   | Pseudomonadales   | Moraxellaceae      |                   |
| 839376                                                                                   | 25                    | Proteobacteria | Gammaproteobacteria   | Aeromonadales     | Aeromonadaceae     |                   |
| 238484                                                                                   | 21                    | Proteobacteria | Gammaproteobacteria   | Pseudomonadales   | Moraxellaceae      |                   |

**Supplemental Data Sheet S3. Core bacterial communities in the industrial effluent I (n=6).**

| OTU     | Detection Frequency % | Phylum         | Class                 | Order              | Family             | Genus            |
|---------|-----------------------|----------------|-----------------------|--------------------|--------------------|------------------|
| 572010  | 33                    | Bacteroidetes  | Bacteroidia           | Bacteroidales      | Bacteroidaceae     | Bacteroides      |
| 45562   | 22                    | Bacteroidetes  | Bacteroidia           | Bacteroidales      | Porphyromonadaceae |                  |
| 459820  | 22                    | Bacteroidetes  | Bacteroidia           | Bacteroidales      | Porphyromonadaceae | Paludibacter     |
| 1092833 | 56                    | Bacteroidetes  | Flavobacteriia        | Flavobacteriales   | [Weeksellaceae]    | Cloacibacterium  |
| 1092718 | 33                    | Bacteroidetes  | Flavobacteriia        | Flavobacteriales   | [Weeksellaceae]    | Cloacibacterium  |
| 1041552 | 22                    | Bacteroidetes  | Flavobacteriia        | Flavobacteriales   | [Weeksellaceae]    | Cloacibacterium  |
| 831485  | 22                    | Bacteroidetes  | Flavobacteriia        | Flavobacteriales   | Flavobacteriaceae  | Flavobacterium   |
| 818174  | 22                    | Bacteroidetes  | Saprospirae           | [Saprospirales]    | Saprospiraceae     |                  |
| 825904  | 22                    | Bacteroidetes  | Sphingobacteriia      | Sphingobacteriales |                    |                  |
| 41211   | 33                    | Chloroflexi    | Chloroflexi           | [Roseiflexales]    | [Kouleothrixaceae] | Kouleothrix      |
| 255811  | 33                    | Chloroflexi    | Chloroflexi           | [Roseiflexales]    | [Kouleothrixaceae] | Kouleothrix      |
| 249034  | 22                    | Proteobacteria | Alphaproteobacteria   |                    |                    |                  |
| 4408777 | 22                    | Proteobacteria | Alphaproteobacteria   | Caulobacterales    | Caulobacteraceae   | Asticcacaulis    |
| 341537  | 22                    | Proteobacteria | Alphaproteobacteria   | Sphingomonadales   | Sphingomonadaceae  | Novosphingobium  |
| 1007128 | 56                    | Proteobacteria | Betaproteobacteria    | Rhodocyclales      | Rhodocyclaceae     | Zoogloea         |
| 835093  | 44                    | Proteobacteria | Betaproteobacteria    | Rhodocyclales      | Rhodocyclaceae     | Zoogloea         |
| 864150  | 33                    | Proteobacteria | Betaproteobacteria    | Rhodocyclales      | Rhodocyclaceae     | Zoogloea         |
| 279025  | 33                    | Proteobacteria | Betaproteobacteria    | Burkholderiales    | Comamonadaceae     |                  |
| 1109857 | 33                    | Proteobacteria | Betaproteobacteria    | Burkholderiales    | Comamonadaceae     | Comamonas        |
| 707172  | 33                    | Proteobacteria | Betaproteobacteria    | Burkholderiales    | Comamonadaceae     | Limnohabitans    |
| 2105446 | 33                    | Proteobacteria | Betaproteobacteria    | Procabacteriales   | Procabacteriaceae  |                  |
| 4298844 | 33                    | Proteobacteria | Betaproteobacteria    | Procabacteriales   | Procabacteriaceae  |                  |
| 1106324 | 22                    | Proteobacteria | Betaproteobacteria    | Burkholderiales    | Comamonadaceae     |                  |
| 255518  | 22                    | Proteobacteria | Betaproteobacteria    | Burkholderiales    | Comamonadaceae     |                  |
| 559109  | 22                    | Proteobacteria | Betaproteobacteria    | Procabacteriales   | Procabacteriaceae  |                  |
| 94716   | 22                    | Proteobacteria | Betaproteobacteria    | Procabacteriales   | Procabacteriaceae  |                  |
| 1111128 | 22                    | Proteobacteria | Betaproteobacteria    | Burkholderiales    | Comamonadaceae     | Hydrogenophaga   |
| 647775  | 22                    | Proteobacteria | Betaproteobacteria    | Burkholderiales    | Comamonadaceae     |                  |
| 829023  | 22                    | Proteobacteria | Betaproteobacteria    | Burkholderiales    | Comamonadaceae     |                  |
| 702854  | 22                    | Proteobacteria | Betaproteobacteria    | Burkholderiales    | Comamonadaceae     | Pelomonas        |
| 554390  | 22                    | Proteobacteria | Deltaproteobacteria   | Bdellovibrionales  | Bacteriovoracaceae | Peredibacter     |
| 1109887 | 22                    | Proteobacteria | Epsilonproteobacteria | Campylobacterales  | Campylobacteraceae | Sulfurospirillum |
| 367605  | 78                    | Proteobacteria | Gammaproteobacteria   | HOC36              |                    |                  |
| 100064  | 67                    | Proteobacteria | Gammaproteobacteria   | Thiotrichales      | Thiotrichaceae     | Thiothrix        |
| 1110300 | 56                    | Proteobacteria | Gammaproteobacteria   | Aeromonadales      | Aeromonadaceae     |                  |
| 831272  | 44                    | Proteobacteria | Gammaproteobacteria   | Thiotrichales      | Thiotrichaceae     | Thiothrix        |
| 853549  | 33                    | Proteobacteria | Gammaproteobacteria   | Aeromonadales      | Aeromonadaceae     |                  |
| 586481  | 22                    | Proteobacteria | Gammaproteobacteria   | Thiotrichales      | Thiotrichaceae     | Thiothrix        |
| 1098706 | 22                    | Proteobacteria | Gammaproteobacteria   | Alteromonadales    | [Chromatiaceae]    | Rheinheimera     |
| 739890  | 22                    | Proteobacteria | Gammaproteobacteria   | Pseudomonadales    | Moraxellaceae      | Acinetobacter    |
| 1134828 | 22                    | SR1            |                       |                    |                    |                  |

**Supplemental Data Sheet S4. Core bacterial communities in the industrial effluent II (n=9).**

| OTU     | Detection Frequency % | Phylum         | Class               | Order             | Family           | Genus           |
|---------|-----------------------|----------------|---------------------|-------------------|------------------|-----------------|
| 1092833 | 100                   | Bacteroidetes  | Flavobacteriia      | Flavobacteriales  | [Weeksellaceae]  | Cloacibacterium |
| 1092718 | 71                    | Bacteroidetes  | Flavobacteriia      | Flavobacteriales  | [Weeksellaceae]  | Cloacibacterium |
| 486302  | 71                    | Bacteroidetes  | Flavobacteriia      | Flavobacteriales  | [Weeksellaceae]  | Cloacibacterium |
| 4154872 | 57                    | Bacteroidetes  | Flavobacteriia      | Flavobacteriales  | [Weeksellaceae]  | Cloacibacterium |
| 1041552 | 57                    | Bacteroidetes  | Flavobacteriia      | Flavobacteriales  | [Weeksellaceae]  | Cloacibacterium |
| 4449324 | 43                    | Bacteroidetes  | Flavobacteriia      | Flavobacteriales  | [Weeksellaceae]  | Cloacibacterium |
| 388958  | 43                    | Bacteroidetes  | Flavobacteriia      | Flavobacteriales  | [Weeksellaceae]  | Cloacibacterium |
| 726608  | 57                    | Proteobacteria | Alphaproteobacteria | Rhodobacterales   | Rhodobacteraceae | Rhodobacter     |
| 521994  | 29                    | Proteobacteria | Alphaproteobacteria | Rhodobacterales   | Rhodobacteraceae | Rhodobacter     |
| 255518  | 100                   | Proteobacteria | Betaproteobacteria  | Burkholderiales   | Comamonadaceae   |                 |
| 668923  | 86                    | Proteobacteria | Betaproteobacteria  | Burkholderiales   | Comamonadaceae   | Schlegelella    |
| 280799  | 71                    | Proteobacteria | Betaproteobacteria  | Burkholderiales   | Comamonadaceae   | Tepidimonas     |
| 554390  | 86                    | Proteobacteria | Deltaproteobacteria | Bdellovibrionales | Bacteriovoraceae | Peredibacter    |

**Supplemental Data Sheet S5. Core bacterial communities in the mine runoff (n=4).**

| OTU     | Detection Frequency % | Phylum         | Class                 | Order              | Family              | Genus             |
|---------|-----------------------|----------------|-----------------------|--------------------|---------------------|-------------------|
| 1106943 | 25                    | Actinobacteria | Actinobacteria        | Actinomycetales    | Microbacteriaceae   | Salinibacterium   |
| 799109  | 25                    | Bacteroidetes  | Cytophagia            | Cytophagales       | Cytophagaceae       | Leadbetterella    |
| 612723  | 25                    | Bacteroidetes  | Cytophagia            | Cytophagales       | Cytophagaceae       | Flectobacillus    |
| 1018521 | 25                    | Bacteroidetes  | Sphingobacteriia      | Sphingobacteriales | Sphingobacteriaceae | Pedobacter        |
| 1085831 | 25                    | Bacteroidetes  | Sphingobacteriia      | Sphingobacteriales | Sphingobacteriaceae | Pedobacter        |
| 1012361 | 25                    | Bacteroidetes  | Sphingobacteriia      | Sphingobacteriales | Sphingobacteriaceae | Pedobacter        |
| 1110257 | 25                    | Bacteroidetes  | Sphingobacteriia      | Sphingobacteriales | Sphingobacteriaceae | Pedobacter        |
| 34401   | 25                    | OP3            | koll11                | GIF10              |                     |                   |
| 724604  | 25                    | OP3            | koll11                | GIF10              |                     |                   |
| 512654  | 25                    | OP3            | PBS-25                |                    |                     |                   |
| 960877  | 25                    | Proteobacteria | Alphaproteobacteria   | Sphingomonadales   | Sphingomonadaceae   | Novosphingobium   |
| 402657  | 25                    | Proteobacteria | Alphaproteobacteria   | Rhodospirillales   | Rhodospirillaceae   |                   |
| 6494    | 75                    | Proteobacteria | Betaproteobacteria    | Gallionellales     | Gallionellaceae     | Gallionella       |
| 1106940 | 75                    | Proteobacteria | Betaproteobacteria    | Burkholderiales    | Comamonadaceae      |                   |
| 829669  | 50                    | Proteobacteria | Betaproteobacteria    | Burkholderiales    | Comamonadaceae      | Hydrogenophaga    |
| 1110291 | 50                    | Proteobacteria | Betaproteobacteria    | Burkholderiales    | Oxalobacteraceae    |                   |
| 1107523 | 50                    | Proteobacteria | Betaproteobacteria    | Gallionellales     | Gallionellaceae     | Gallionella       |
| 1111096 | 25                    | Proteobacteria | Betaproteobacteria    | Burkholderiales    | Comamonadaceae      | Rhodoferax        |
| 789011  | 25                    | Proteobacteria | Betaproteobacteria    | Burkholderiales    | Oxalobacteraceae    | Polynucleobacter  |
| 593436  | 25                    | Proteobacteria | Betaproteobacteria    | Gallionellales     | Gallionellaceae     | Gallionella       |
| 594332  | 25                    | Proteobacteria | Betaproteobacteria    | Gallionellales     | Gallionellaceae     | Gallionella       |
| 1105719 | 25                    | Proteobacteria | Betaproteobacteria    | Burkholderiales    | Comamonadaceae      | Rhodoferax        |
| 991503  | 25                    | Proteobacteria | Betaproteobacteria    | Burkholderiales    | Oxalobacteraceae    |                   |
| 832674  | 25                    | Proteobacteria | Betaproteobacteria    | Burkholderiales    | Oxalobacteraceae    | Janthinobacterium |
| 541363  | 25                    | Proteobacteria | Betaproteobacteria    | Burkholderiales    | Comamonadaceae      |                   |
| 574746  | 25                    | Proteobacteria | Betaproteobacteria    | Gallionellales     | Gallionellaceae     | Gallionella       |
| 1107408 | 25                    | Proteobacteria | Betaproteobacteria    | Burkholderiales    | Comamonadaceae      | Limnohabitans     |
| 546999  | 25                    | Proteobacteria | Betaproteobacteria    | Gallionellales     | Gallionellaceae     | Gallionella       |
| 358252  | 25                    | Proteobacteria | Betaproteobacteria    | Burkholderiales    | Oxalobacteraceae    | Polynucleobacter  |
| 986745  | 25                    | Proteobacteria | Betaproteobacteria    | Burkholderiales    | Comamonadaceae      | Rhodoferax        |
| 723936  | 25                    | Proteobacteria | Betaproteobacteria    | Burkholderiales    | Oxalobacteraceae    | Polynucleobacter  |
| 977051  | 25                    | Proteobacteria | Betaproteobacteria    | Methylophilales    | Methylophilaceae    |                   |
| 590236  | 25                    | Proteobacteria | Betaproteobacteria    | Burkholderiales    | Oxalobacteraceae    | Janthinobacterium |
| 818376  | 25                    | Proteobacteria | Betaproteobacteria    | Burkholderiales    | Comamonadaceae      | Rhodoferax        |
| 572788  | 25                    | Proteobacteria | Betaproteobacteria    | Burkholderiales    | Oxalobacteraceae    | Janthinobacterium |
| 796924  | 25                    | Proteobacteria | Betaproteobacteria    | Burkholderiales    | Comamonadaceae      | Rhodoferax        |
| 268413  | 25                    | Proteobacteria | Deltaproteobacteria   | MBNT15             |                     |                   |
| 1021984 | 25                    | Proteobacteria | Deltaproteobacteria   | Myxococcales       |                     |                   |
| 791566  | 50                    | Proteobacteria | Epsilonproteobacteria | Campylobacterales  | Helicobacteraceae   | Sulfuricurvum     |
| 811080  | 25                    | Proteobacteria | Epsilonproteobacteria | Campylobacterales  | Helicobacteraceae   | Sulfuricurvum     |
| 825090  | 25                    | Proteobacteria | Epsilonproteobacteria | Campylobacterales  | Campylobacteraceae  | Arcobacter        |
| 1094834 | 25                    | Proteobacteria | Gammaproteobacteria   | Pseudomonadales    | Pseudomonadaceae    | Pseudomonas       |
| 3095738 | 25                    | Proteobacteria | Gammaproteobacteria   | Alteromonadales    | Alteromonadaceae    | Cellvibrio        |
| 1110447 | 25                    | Proteobacteria | Gammaproteobacteria   | Pseudomonadales    | Pseudomonadaceae    | Pseudomonas       |
| 670210  | 25                    | Proteobacteria | Gammaproteobacteria   | Pseudomonadales    | Pseudomonadaceae    | Pseudomonas       |

**Supplemental Data Sheet S6. Core bacterial communities in the surface water (n=115).**

| OTU     | Detection Frequency % | Phylum          | Class                | Order                | Family                | Genus                        |
|---------|-----------------------|-----------------|----------------------|----------------------|-----------------------|------------------------------|
| 737649  | 83                    | Actinobacteria  | Actinobacteria       | Actinomycetales      | ACK-M1                |                              |
| 813339  | 69                    | Actinobacteria  | Actinobacteria       | Actinomycetales      | ACK-M1                |                              |
| 817301  | 28                    | Actinobacteria  | Actinobacteria       | Actinomycetales      | ACK-M1                |                              |
| 825494  | 27                    | Actinobacteria  | Actinobacteria       | Actinomycetales      | ACK-M1                |                              |
| 806314  | 23                    | Actinobacteria  | Actinobacteria       | Actinomycetales      | ACK-M1                |                              |
| 1105807 | 24                    | Bacteroidetes   | Cytophagia           | Cytophagales         | Cytophagaceae         |                              |
| 664907  | 59                    | Bacteroidetes   | Saprospirae          | [Saprospirales]      | Chitinophagaceae      | Sediminibacterium            |
| 625083  | 59                    | Bacteroidetes   | Saprospirae          | [Saprospirales]      | Chitinophagaceae      | Sediminibacterium            |
| 342101  | 25                    | Bacteroidetes   | Saprospirae          | [Saprospirales]      | Chitinophagaceae      | Sediminibacterium            |
| 592846  | 21                    | Bacteroidetes   | Sphingobacteriia     | Sphingobacteriales   |                       |                              |
| 345003  | 43                    | Chloroflexi     | SL56                 |                      |                       |                              |
| 28705   | 46                    | Planctomycetes  | Phycisphaerae        | Phycisphaerales      |                       |                              |
| 36013   | 23                    | Planctomycetes  | Phycisphaerae        | Phycisphaerales      |                       |                              |
| 4151695 | 48                    | Planctomycetes  | Planctomycetia       | Gemmatales           | Gemmataceae           |                              |
| 560655  | 96                    | Proteobacteria  | Alphaproteobacteria  | Rickettsiales        | Pelagibacteraceae     |                              |
| 657305  | 43                    | Proteobacteria  | Alphaproteobacteria  | Rhizobiales          | Methylocystaceae      |                              |
| 228936  | 31                    | Proteobacteria  | Alphaproteobacteria  | Rhizobiales          |                       |                              |
| 1106956 | 98                    | Proteobacteria  | Betaproteobacteria   | Methylophilales      | Methylophilaceae      |                              |
| 848585  | 96                    | Proteobacteria  | Betaproteobacteria   | Burkholderiales      | Comamonadaceae        |                              |
| 723936  | 75                    | Proteobacteria  | Betaproteobacteria   | Burkholderiales      | Oxalobacteraceae      | Polynucleobacter             |
| 923760  | 54                    | Proteobacteria  | Betaproteobacteria   |                      |                       |                              |
| 343207  | 53                    | Proteobacteria  | Betaproteobacteria   | Burkholderiales      | Comamonadaceae        | Limnohabitans                |
| 1107408 | 49                    | Proteobacteria  | Betaproteobacteria   | Burkholderiales      | Comamonadaceae        | Limnohabitans                |
| 806744  | 48                    | Proteobacteria  | Betaproteobacteria   | Burkholderiales      | Oxalobacteraceae      | Polynucleobacter             |
| 1106940 | 46                    | Proteobacteria  | Betaproteobacteria   | Burkholderiales      | Comamonadaceae        |                              |
| 593436  | 40                    | Proteobacteria  | Betaproteobacteria   | Gallionellales       | Gallionellaceae       | Gallionella                  |
| 713354  | 36                    | Proteobacteria  | Betaproteobacteria   | Burkholderiales      | Comamonadaceae        | Rhodoferrax                  |
| 340432  | 33                    | Proteobacteria  | Betaproteobacteria   |                      |                       |                              |
| 1109857 | 31                    | Proteobacteria  | Betaproteobacteria   | Burkholderiales      | Comamonadaceae        | Comamonas                    |
| 730679  | 28                    | Proteobacteria  | Betaproteobacteria   | Burkholderiales      | Alcaligenaceae        |                              |
| 358252  | 23                    | Proteobacteria  | Betaproteobacteria   | Burkholderiales      | Oxalobacteraceae      | Polynucleobacter             |
| 658233  | 45                    | Proteobacteria  | Gammaaproteobacteria | Methylococcales      | Crenotrichaceae       | Crenothrix                   |
| 99085   | 37                    | Verrucomicrobia | Spartobacteria       | [Chthoniobacterales] | [Chthoniobacteraceae] | Candidatus Xiphinematobacter |

**Supplemental Data Sheet S7. Core bacterial communities in the pretreated water (n=10).**

| OTU     | Detection Frequency % | Phylum          | Class               | Order              | Family            | Genus             |
|---------|-----------------------|-----------------|---------------------|--------------------|-------------------|-------------------|
| 813339  | 78                    | Actinobacteria  | Actinobacteria      | Actinomycetales    | ACK-M1            |                   |
| 817301  | 78                    | Actinobacteria  | Actinobacteria      | Actinomycetales    | ACK-M1            |                   |
| 737649  | 67                    | Actinobacteria  | Actinobacteria      | Actinomycetales    | ACK-M1            |                   |
| 805542  | 56                    | Actinobacteria  | Actinobacteria      | Actinomycetales    | ACK-M1            |                   |
| 578307  | 33                    | Actinobacteria  | Actinobacteria      | Actinomycetales    |                   |                   |
| 825494  | 33                    | Actinobacteria  | Actinobacteria      | Actinomycetales    | ACK-M1            |                   |
| 792520  | 33                    | Actinobacteria  | Actinobacteria      | Actinomycetales    | ACK-M1            |                   |
| 806314  | 22                    | Actinobacteria  | Actinobacteria      | Actinomycetales    | ACK-M1            |                   |
| 830978  | 22                    | Actinobacteria  | Actinobacteria      | Actinomycetales    | ACK-M1            |                   |
| 1105807 | 89                    | Bacteroidetes   | Cytophagia          | Cytophagales       | Cytophagaceae     |                   |
| 664907  | 67                    | Bacteroidetes   | Saprospirae         | [Saprospirales]    | Chitinophagaceae  | Sediminibacterium |
| 1023749 | 22                    | Bacteroidetes   | Saprospirae         | [Saprospirales]    | Chitinophagaceae  |                   |
| 625083  | 100                   | Bacteroidetes   | Saprospirae         | [Saprospirales]    | Chitinophagaceae  | Sediminibacterium |
| 806744  | 100                   | Bacteroidetes   | Saprospirae         | Burkholderiales    | Oxalobacteraceae  | Polynucleobacter  |
| 723936  | 100                   | Bacteroidetes   | Saprospirae         | Burkholderiales    | Oxalobacteraceae  | Polynucleobacter  |
| 342101  | 44                    | Bacteroidetes   | Saprospirae         | [Saprospirales]    | Chitinophagaceae  | Sediminibacterium |
| 592846  | 22                    | Bacteroidetes   | Sphingobacteriia    | Sphingobacteriales |                   |                   |
| 560655  | 100                   | Proteobacteria  | Alphaproteobacteria | Rickettsiales      | Pelagibacteraceae |                   |
| 346466  | 44                    | Proteobacteria  | Alphaproteobacteria | Burkholderiales    | Comamonadaceae    |                   |
| 341222  | 22                    | Proteobacteria  | Alphaproteobacteria | Rickettsiales      | Pelagibacteraceae |                   |
| 1106956 | 100                   | Proteobacteria  | Betaproteobacteria  | Methylophilales    | Methylophilaceae  |                   |
| 848585  | 89                    | Proteobacteria  | Betaproteobacteria  | Burkholderiales    | Comamonadaceae    |                   |
| 1109857 | 78                    | Proteobacteria  | Betaproteobacteria  | Burkholderiales    | Comamonadaceae    | Comamonas         |
| 338157  | 67                    | Proteobacteria  | Betaproteobacteria  | Holophagales       | Holophagaceae     |                   |
| 593436  | 56                    | Proteobacteria  | Betaproteobacteria  | Gallionellales     | Gallionellaceae   | Gallionella       |
| 340432  | 44                    | Proteobacteria  | Betaproteobacteria  |                    |                   |                   |
| 923760  | 33                    | Proteobacteria  | Betaproteobacteria  |                    |                   |                   |
| 789011  | 33                    | Proteobacteria  | Betaproteobacteria  | Burkholderiales    | Oxalobacteraceae  | Polynucleobacter  |
| 1107408 | 33                    | Proteobacteria  | Betaproteobacteria  | Burkholderiales    | Comamonadaceae    | Limnohabitans     |
| 1107402 | 33                    | Proteobacteria  | Betaproteobacteria  | Burkholderiales    | Comamonadaceae    | Limnohabitans     |
| 358252  | 33                    | Proteobacteria  | Betaproteobacteria  | Burkholderiales    | Oxalobacteraceae  | Polynucleobacter  |
| 343207  | 33                    | Proteobacteria  | Betaproteobacteria  | Burkholderiales    | Comamonadaceae    | Limnohabitans     |
| 1111096 | 22                    | Proteobacteria  | Betaproteobacteria  | Burkholderiales    | Comamonadaceae    | Rhodoferrax       |
| 897527  | 22                    | Proteobacteria  | Betaproteobacteria  | Nitrosomonadales   | Nitrosomonadaceae |                   |
| 557255  | 22                    | Proteobacteria  | Betaproteobacteria  |                    |                   |                   |
| 730679  | 22                    | Proteobacteria  | Betaproteobacteria  | Burkholderiales    | Alcaligenaceae    |                   |
| 1105353 | 22                    | Proteobacteria  | Betaproteobacteria  | Burkholderiales    | Comamonadaceae    |                   |
| 713354  | 22                    | Proteobacteria  | Betaproteobacteria  | Burkholderiales    | Comamonadaceae    | Rhodoferrax       |
| 546705  | 22                    | Proteobacteria  | Betaproteobacteria  | Burkholderiales    | Oxalobacteraceae  | Polynucleobacter  |
| 340581  | 22                    | Proteobacteria  | Betaproteobacteria  | Burkholderiales    | Oxalobacteraceae  | Polynucleobacter  |
| 1106940 | 22                    | Proteobacteria  | Betaproteobacteria  | Burkholderiales    | Comamonadaceae    |                   |
| 658233  | 22                    | Proteobacteria  | Gammaproteobacteria | Methylococcales    | Crenotrichaceae   | Crenothrix        |
| 209628  | 33                    | Verrucomicrobia | Opitutae            | Opitiales          | Opitutaceae       |                   |



**Supplemental Data Sheet S8.** Core bacterial communities in the groundwater observation well and production well (n=26).

| OTU     | Detection Frequency % | Phylum         | Class               | Order              | Family            | Genus          |
|---------|-----------------------|----------------|---------------------|--------------------|-------------------|----------------|
| 629448  | 27                    | Acidobacteria  | Acidobacteria-5     |                    |                   |                |
| 557143  | 58                    | Acidobacteria  | Acidobacteria-6     | iii1-15            |                   |                |
| 592524  | 54                    | Acidobacteria  | Acidobacteria-6     | iii1-15            | mb2424            |                |
| 582670  | 27                    | Acidobacteria  | Acidobacteria-6     | iii1-15            |                   |                |
| 179461  | 27                    | Bacteroidetes  | Flavobacteriia      | Flavobacteriales   | Cryomorphaceae    | Fluviicola     |
| 525642  | 27                    | Bacteroidetes  | Sphingobacteriia    | Sphingobacteriales |                   |                |
| 356355  | 23                    | Planctomycetes | Planctomycetia      | Planctomycetales   | Planctomycetaceae | Planctomyces   |
| 832194  | 88                    | Proteobacteria | Alphaproteobacteria | Rhodospirillales   | Rhodospirillaceae |                |
| 571360  | 81                    | Proteobacteria | Alphaproteobacteria | Rhodospirillales   | Rhodospirillaceae |                |
| 756153  | 62                    | Proteobacteria | Alphaproteobacteria | Rhizobiales        | Hyphomicrobiaceae | Rhodoplanes    |
| 583130  | 62                    | Proteobacteria | Alphaproteobacteria | Rhodospirillales   | Acetobacteraceae  |                |
| 569368  | 38                    | Proteobacteria | Alphaproteobacteria | Rhizobiales        | Hyphomicrobiaceae | Rhodoplanes    |
| 583185  | 38                    | Proteobacteria | Alphaproteobacteria | Rhizobiales        | Hyphomicrobiaceae |                |
| 716576  | 31                    | Proteobacteria | Alphaproteobacteria | Rhodospirillales   | Rhodospirillaceae |                |
| 244655  | 31                    | Proteobacteria | Alphaproteobacteria | Rhodospirillales   | Rhodospirillaceae |                |
| 574255  | 23                    | Proteobacteria | Alphaproteobacteria | Rhizobiales        | Hyphomicrobiaceae | Hyphomicrobium |
| 923760  | 81                    | Proteobacteria | Betaproteobacteria  |                    |                   |                |
| 203879  | 77                    | Proteobacteria | Betaproteobacteria  |                    |                   |                |
| 593212  | 73                    | Proteobacteria | Betaproteobacteria  |                    |                   |                |
| 220761  | 62                    | Proteobacteria | Betaproteobacteria  |                    |                   |                |
| 1109401 | 58                    | Proteobacteria | Betaproteobacteria  |                    |                   |                |
| 694781  | 50                    | Proteobacteria | Betaproteobacteria  | MND1               |                   |                |
| 240278  | 46                    | Proteobacteria | Betaproteobacteria  |                    |                   |                |
| 567333  | 38                    | Proteobacteria | Betaproteobacteria  |                    |                   |                |
| 548352  | 31                    | Proteobacteria | Betaproteobacteria  | IS-44              |                   |                |
| 903951  | 27                    | Proteobacteria | Betaproteobacteria  |                    |                   |                |
| 254098  | 27                    | Proteobacteria | Betaproteobacteria  |                    |                   |                |
| 817446  | 27                    | Proteobacteria | Betaproteobacteria  |                    |                   |                |
| 3984836 | 27                    | Proteobacteria | Betaproteobacteria  |                    |                   |                |
| 536176  | 23                    | Proteobacteria | Betaproteobacteria  | IS-44              |                   |                |
| 771634  | 31                    | Proteobacteria | Deltaproteobacteria | Myxococcales       | 0319-6G20         |                |

**Supplemental Data Sheet S9.** Core bacterial communities in the groundwater observation wells (n=16).

| OTU     | Detection Frequency % | Phylum         | Class               | Order              | Family            | Genus             |
|---------|-----------------------|----------------|---------------------|--------------------|-------------------|-------------------|
| 629448  | 29                    | Acidobacteria  | Acidobacteria-5     |                    |                   |                   |
| 592524  | 76                    | Acidobacteria  | Acidobacteria-6     | iii1-15            | mb2424            |                   |
| 557143  | 47                    | Acidobacteria  | Acidobacteria-6     | iii1-15            |                   |                   |
| 584801  | 24                    | Acidobacteria  | Acidobacteria-6     | iii1-15            |                   |                   |
| 4395040 | 24                    | Acidobacteria  | Solibacteres        | Solibacterales     | [Bryobacteraceae] |                   |
| 813339  | 24                    | Actinobacteria | Actinobacteria      | Actinomycetales    | ACK-M1            |                   |
| 179461  | 24                    | Bacteroidetes  | Flavobacteriia      | Flavobacteriales   | Cryomorphaceae    | Fluviicola        |
| 625083  | 24                    | Bacteroidetes  | Saprospirae         | [Saprospirales]    | Chitinophagaceae  | Sediminibacterium |
| 525642  | 29                    | Bacteroidetes  | Sphingobacteriia    | Sphingobacteriales |                   |                   |
| 4461517 | 24                    | Bacteroidetes  | Sphingobacteriia    | Sphingobacteriales |                   |                   |
| 733904  | 24                    | Nitrospirae    | Nitrospira          | Nitrospirales      |                   |                   |
| 716576  | 29                    | Planctomycetes | Planctomycetia      | Rhodospirillales   | Rhodospirillaceae |                   |
| 356355  | 29                    | Planctomycetes | Planctomycetia      | Planctomycetales   | Planctomycetaceae | Planctomyces      |
| 832194  | 71                    | Proteobacteria | Alphaproteobacteria | Rhodospirillales   | Rhodospirillaceae |                   |
| 571360  | 65                    | Proteobacteria | Alphaproteobacteria | Rhodospirillales   | Rhodospirillaceae |                   |
| 569368  | 47                    | Proteobacteria | Alphaproteobacteria | Rhizobiales        | Hyphomicrobiaceae | Rhodoplanes       |
| 756153  | 47                    | Proteobacteria | Alphaproteobacteria | Rhizobiales        | Hyphomicrobiaceae | Rhodoplanes       |
| 560655  | 35                    | Proteobacteria | Alphaproteobacteria | Rickettsiales      | Pelagibacteraceae |                   |
| 574255  | 29                    | Proteobacteria | Alphaproteobacteria | Rhizobiales        | Hyphomicrobiaceae | Hyphomicrobium    |
| 583130  | 29                    | Proteobacteria | Alphaproteobacteria | Rhodospirillales   | Acetobacteraceae  |                   |
| 545287  | 24                    | Proteobacteria | Alphaproteobacteria |                    |                   |                   |
| 923760  | 76                    | Proteobacteria | Betaproteobacteria  |                    |                   |                   |
| 593212  | 65                    | Proteobacteria | Betaproteobacteria  |                    |                   |                   |
| 203879  | 59                    | Proteobacteria | Betaproteobacteria  |                    |                   |                   |
| 548352  | 41                    | Proteobacteria | Betaproteobacteria  | IS-44              |                   |                   |
| 220761  | 35                    | Proteobacteria | Betaproteobacteria  |                    |                   |                   |
| 557255  | 29                    | Proteobacteria | Betaproteobacteria  |                    |                   |                   |
| 694781  | 29                    | Proteobacteria | Betaproteobacteria  | MND1               |                   |                   |
| 240278  | 29                    | Proteobacteria | Betaproteobacteria  |                    |                   |                   |
| 723936  | 29                    | Proteobacteria | Betaproteobacteria  | Burkholderiales    | Oxalobacteraceae  | Polynucleobacter  |
| 977051  | 29                    | Proteobacteria | Betaproteobacteria  | Methylophilales    | Methylophilaceae  |                   |
| 536176  | 24                    | Proteobacteria | Betaproteobacteria  | IS-44              |                   |                   |
| 1109401 | 24                    | Proteobacteria | Betaproteobacteria  |                    |                   |                   |
| 593436  | 24                    | Proteobacteria | Betaproteobacteria  | Gallionellales     | Gallionellaceae   | Gallionella       |
| 567333  | 24                    | Proteobacteria | Betaproteobacteria  |                    |                   |                   |
| 254098  | 24                    | Proteobacteria | Betaproteobacteria  |                    |                   |                   |
| 3984836 | 24                    | Proteobacteria | Betaproteobacteria  |                    |                   |                   |
| 771634  | 47                    | Proteobacteria | Deltaproteobacteria | Myxococcales       | 0319-6G20         |                   |

**Supplemental Data Sheet S10.** Core bacterial communities in the production well (n=10).

| OTU     | Detection Frequency % | Phylum         | Class               | Order               | Family               | Genus          |
|---------|-----------------------|----------------|---------------------|---------------------|----------------------|----------------|
| 629448  | 20                    | Acidobacteria  | Acidobacteria-5     |                     |                      |                |
| 557143  | 70                    | Acidobacteria  | Acidobacteria-6     | iii1-15             |                      |                |
| 582670  | 50                    | Acidobacteria  | Acidobacteria-6     | iii1-15             |                      |                |
| 1111117 | 30                    | Acidobacteria  | Acidobacteria-6     | iii1-15             |                      |                |
| 138750  | 20                    | Acidobacteria  | Acidobacteria-6     | iii1-15             |                      |                |
| 179461  | 30                    | Bacteroidetes  | Flavobacteriia      | Flavobacteriales    | Cryomorphaceae       | Fluviicola     |
| 83335   | 30                    | Bacteroidetes  | Sphingobacteriia    | Sphingobacteriales  |                      |                |
| 525642  | 20                    | Bacteroidetes  | Sphingobacteriia    | Sphingobacteriales  |                      |                |
| 2775220 | 20                    | Bacteroidetes  | Sphingobacteriia    | Sphingobacteriales  |                      |                |
| 1139829 | 20                    | Crenarchaeota  | Thaumarchaeota      | Cenarchaeales       | Cenarchaeaceae       | Nitrosopumilus |
| 159567  | 20                    | PAUC34f        |                     |                     |                      |                |
| 571360  | 100                   | Proteobacteria | Alphaproteobacteria | Rhodospirillales    | Rhodospirillaceae    |                |
| 583130  | 100                   | Proteobacteria | Alphaproteobacteria | Rhodospirillales    | Acetobacteraceae     |                |
| 832194  | 100                   | Proteobacteria | Alphaproteobacteria | Rhodospirillales    | Rhodospirillaceae    |                |
| 756153  | 80                    | Proteobacteria | Alphaproteobacteria | Rhizobiales         | Hyphomicrobiaceae    | Rhodoplanes    |
| 583185  | 60                    | Proteobacteria | Alphaproteobacteria | Rhizobiales         | Hyphomicrobiaceae    |                |
| 244655  | 50                    | Proteobacteria | Alphaproteobacteria | Rhodospirillales    | Rhodospirillaceae    |                |
| 956326  | 40                    | Proteobacteria | Alphaproteobacteria | Rhodospirillales    | Rhodospirillaceae    |                |
| 716576  | 30                    | Proteobacteria | Alphaproteobacteria | Rhodospirillales    | Rhodospirillaceae    |                |
| 353828  | 20                    | Proteobacteria | Alphaproteobacteria | Rhizobiales         | Hyphomicrobiaceae    | Rhodoplanes    |
| 3329856 | 20                    | Proteobacteria | Alphaproteobacteria | Rhodospirillales    | Rhodospirillaceae    |                |
| 1109401 | 100                   | Proteobacteria | Betaproteobacteria  |                     |                      |                |
| 203879  | 100                   | Proteobacteria | Betaproteobacteria  |                     |                      |                |
| 220761  | 100                   | Proteobacteria | Betaproteobacteria  |                     |                      |                |
| 923760  | 80                    | Proteobacteria | Betaproteobacteria  |                     |                      |                |
| 694781  | 70                    | Proteobacteria | Betaproteobacteria  | MND1                |                      |                |
| 567333  | 60                    | Proteobacteria | Betaproteobacteria  |                     |                      |                |
| 240278  | 60                    | Proteobacteria | Betaproteobacteria  |                     |                      |                |
| 593212  | 60                    | Proteobacteria | Betaproteobacteria  |                     |                      |                |
| 903951  | 30                    | Proteobacteria | Betaproteobacteria  |                     |                      |                |
| 4415049 | 30                    | Proteobacteria | Betaproteobacteria  |                     |                      |                |
| 224230  | 30                    | Proteobacteria | Betaproteobacteria  |                     |                      |                |
| 254098  | 30                    | Proteobacteria | Betaproteobacteria  |                     |                      |                |
| 817446  | 30                    | Proteobacteria | Betaproteobacteria  |                     |                      |                |
| 1110386 | 30                    | Proteobacteria | Betaproteobacteria  |                     |                      |                |
| 536176  | 20                    | Proteobacteria | Betaproteobacteria  | IS-44               |                      |                |
| 205810  | 20                    | Proteobacteria | Betaproteobacteria  |                     |                      |                |
| 508906  | 20                    | Proteobacteria | Betaproteobacteria  |                     |                      |                |
| 3984836 | 20                    | Proteobacteria | Betaproteobacteria  |                     |                      |                |
| 1112928 | 20                    | Proteobacteria | Deltaproteobacteria | Syntrophobacterales | Syntrophobacteraceae |                |
